# Supplementary material
Source: publisher site journal article supplement (http://kjim.org/upload/media/kjim-2020-629-suppl7.pdf)

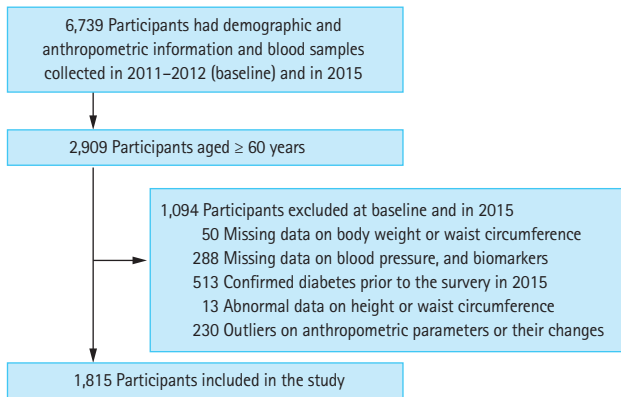

**Supplementary Figure 1.** Flowchart.

Supplement: Supplementary file 1 [file kjim-2020-629-suppl7.pdf]
